# Supplementary material for: Mid-mantle deformation inferred from seismic anisotropy
Source: Springer Nature journal article supplement (doi:10.1038/415777a), 2002-02-01

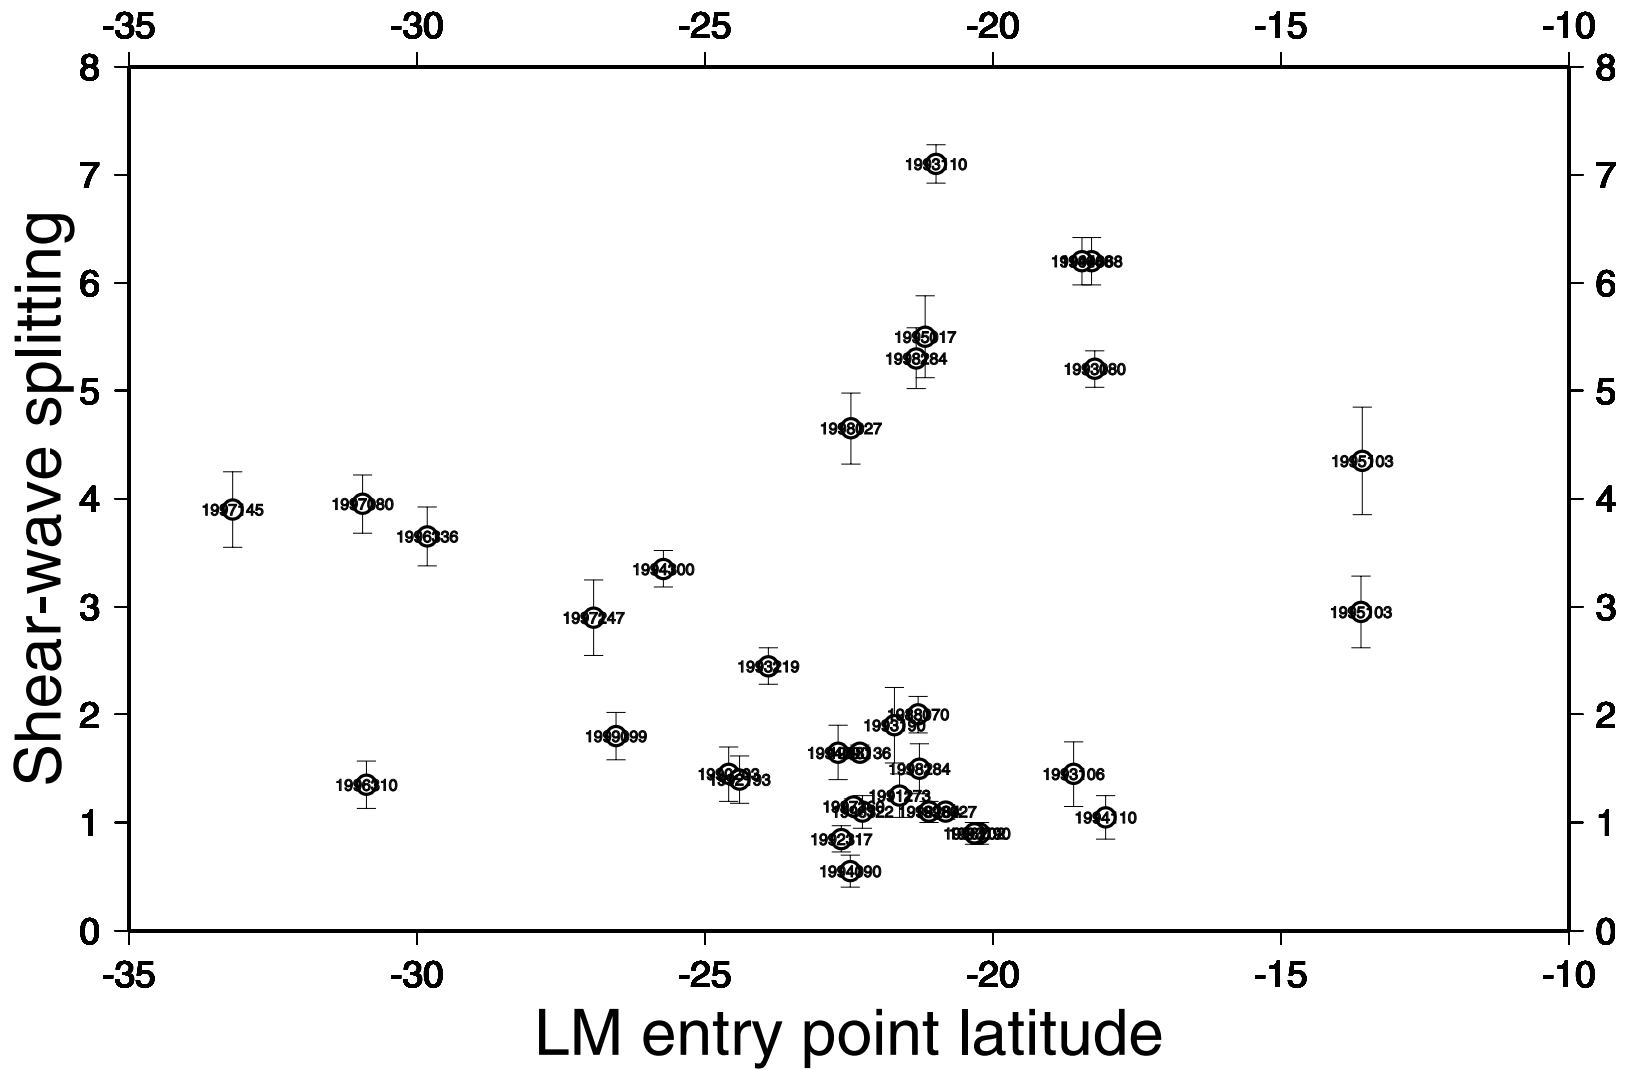

Supplement: 41586_2002_BF415777a_MOESM1_ESM.pdf [file 41586_2002_BF415777a_MOESM1_ESM.pdf]
